# Supplementary material for: Relationship between Cortical Thickness and EEG Alterations during Sleep in the Alzheimer’s Disease
Source: MDPI journal article supplement (doi:10.3390/brainsci11091174), 2021-09-04
Supplement: s1 [file s1]

## Supplemental Materials

### Supplemental Figures

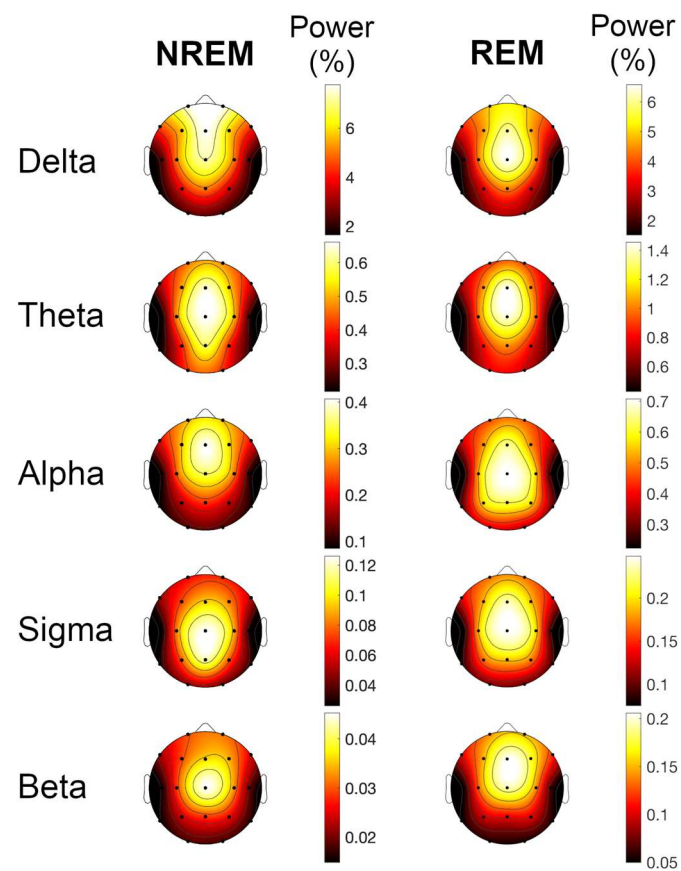

**Figure S1. Topographic distribution of EEG power (%) during NREM and REM sleep in the sample of AD patients.** Topographic maps of the spectral power (%) during NREM (1<sup>st</sup> column) and REM sleep (2<sup>nd</sup> column) in AD. The topographic maps are scaled between minimal and maximal values within each map.

### NREM SIGMA

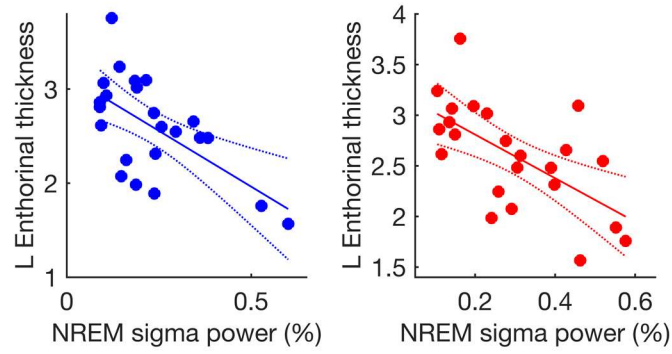

### REM DELTA

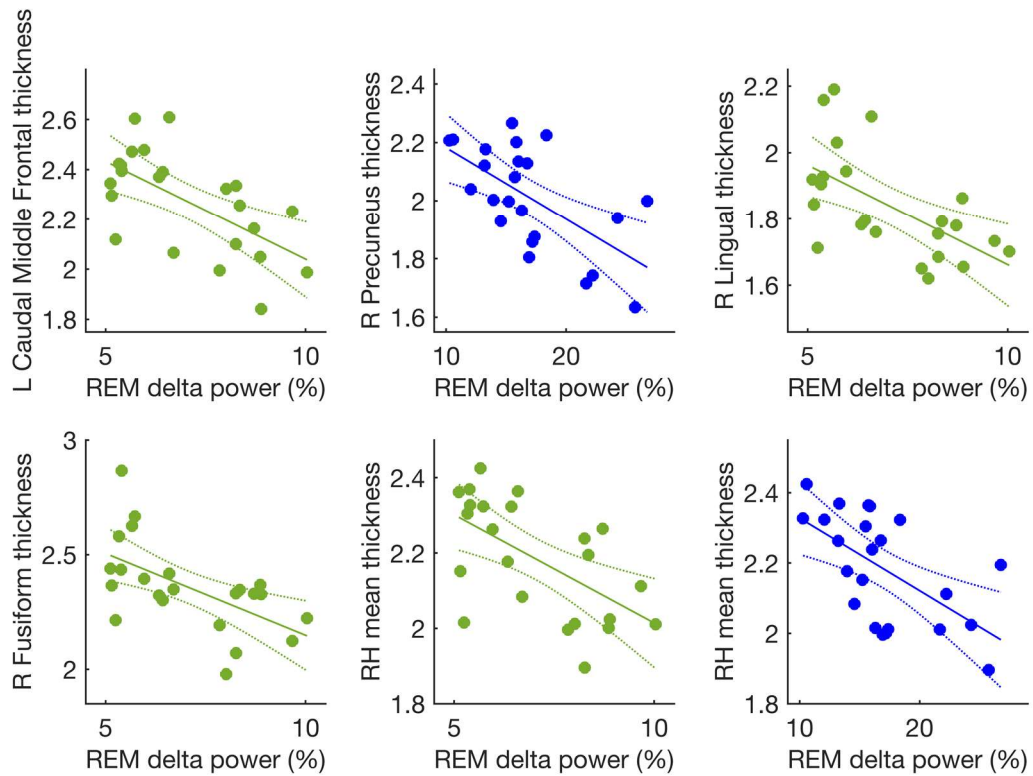

### REM BETA

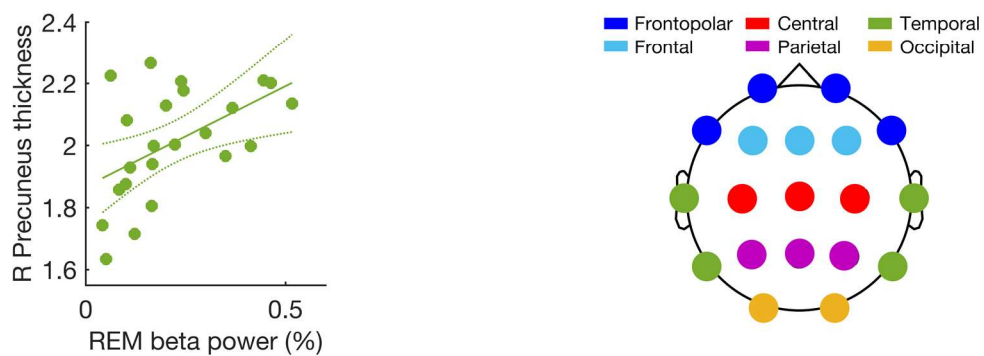

**Figure S2. Correlations between cortical thickness and sleep EEG indexes.** Cortical thickness (mm) vs. EEG power (%) scatterplots for cortical areas and sleep EEG indexes showing a significant relationship after FDR correction but excluded from Figure 2 in the main text.

## Tables

**Table S1.** Results from the control analysis with partial correlations (partial  $r$  coefficients and corresponding  $p$  values) controlling for age and sex on cortical thickness and relevant EEG indexes of NREM and REM sleep showing significant associations in the principal analysis.

| RM Cortical areas     | Side | sleep index | EEG cluster | Partial $r$ | $p$     |
|-----------------------|------|-------------|-------------|-------------|---------|
| Caudal middle frontal | L    | REM Delta   | Temporal    | -0.61       | 0.0034  |
|                       | R    | REM Delta   | Temporal    | -0.64       | 0.0020  |
| Entorhinal            | L    | NREM sigma  | Frontopolar | -0.62       | 0.0028  |
|                       | L    | NREM sigma  | Frontal     | -0.67       | 0.00090 |
|                       | L    | NREM sigma  | Central     | -0.62       | 0.0027  |
| Fusiform              | R    | REM Delta   | Frontopolar | -0.71       | 0.00029 |
|                       | R    | REM Delta   | Temporal    | -0.53       | 0.014   |
| Lingual               | R    | REM Delta   | Frontopolar | -0.65       | 0.0016  |
|                       | R    | REM Delta   | Temporal    | -0.55       | 0.0098  |
| Precuneus             | R    | NREM sigma  | Parietal    | 0.53        | 0.013   |
|                       | R    | REM delta   | Frontopolar | -0.69       | 0.00049 |
|                       | R    | REM delta   | Temporal    | -0.68       | 0.00069 |
|                       | R    | REM beta    | Temporal    | 0.51        | 0.017   |
|                       | R    | REM beta    | Occipital   | 0.51        | 0.017   |
| Superior parietal     | R    | REM delta   | Temporal    | -0.60       | 0.0039  |
| Mean thickness        | R    | REM delta   | Frontopolar | -0.63       | 0.0024  |
|                       | R    | REM delta   | Temporal    | -0.61       | 0.0034  |

Abbreviations: MR, magnetic resonance; L, left hemisphere; R, right hemisphere; NREM, non-rapid eye movement sleep; REM, rapid eye movement sleep.
